# Supplementary material
Source: Springer Nature journal article supplement (https://www.springermedizin.de/resource/supplementary/12876_2010_542_MOESM3_ESM.pdf/9437354)

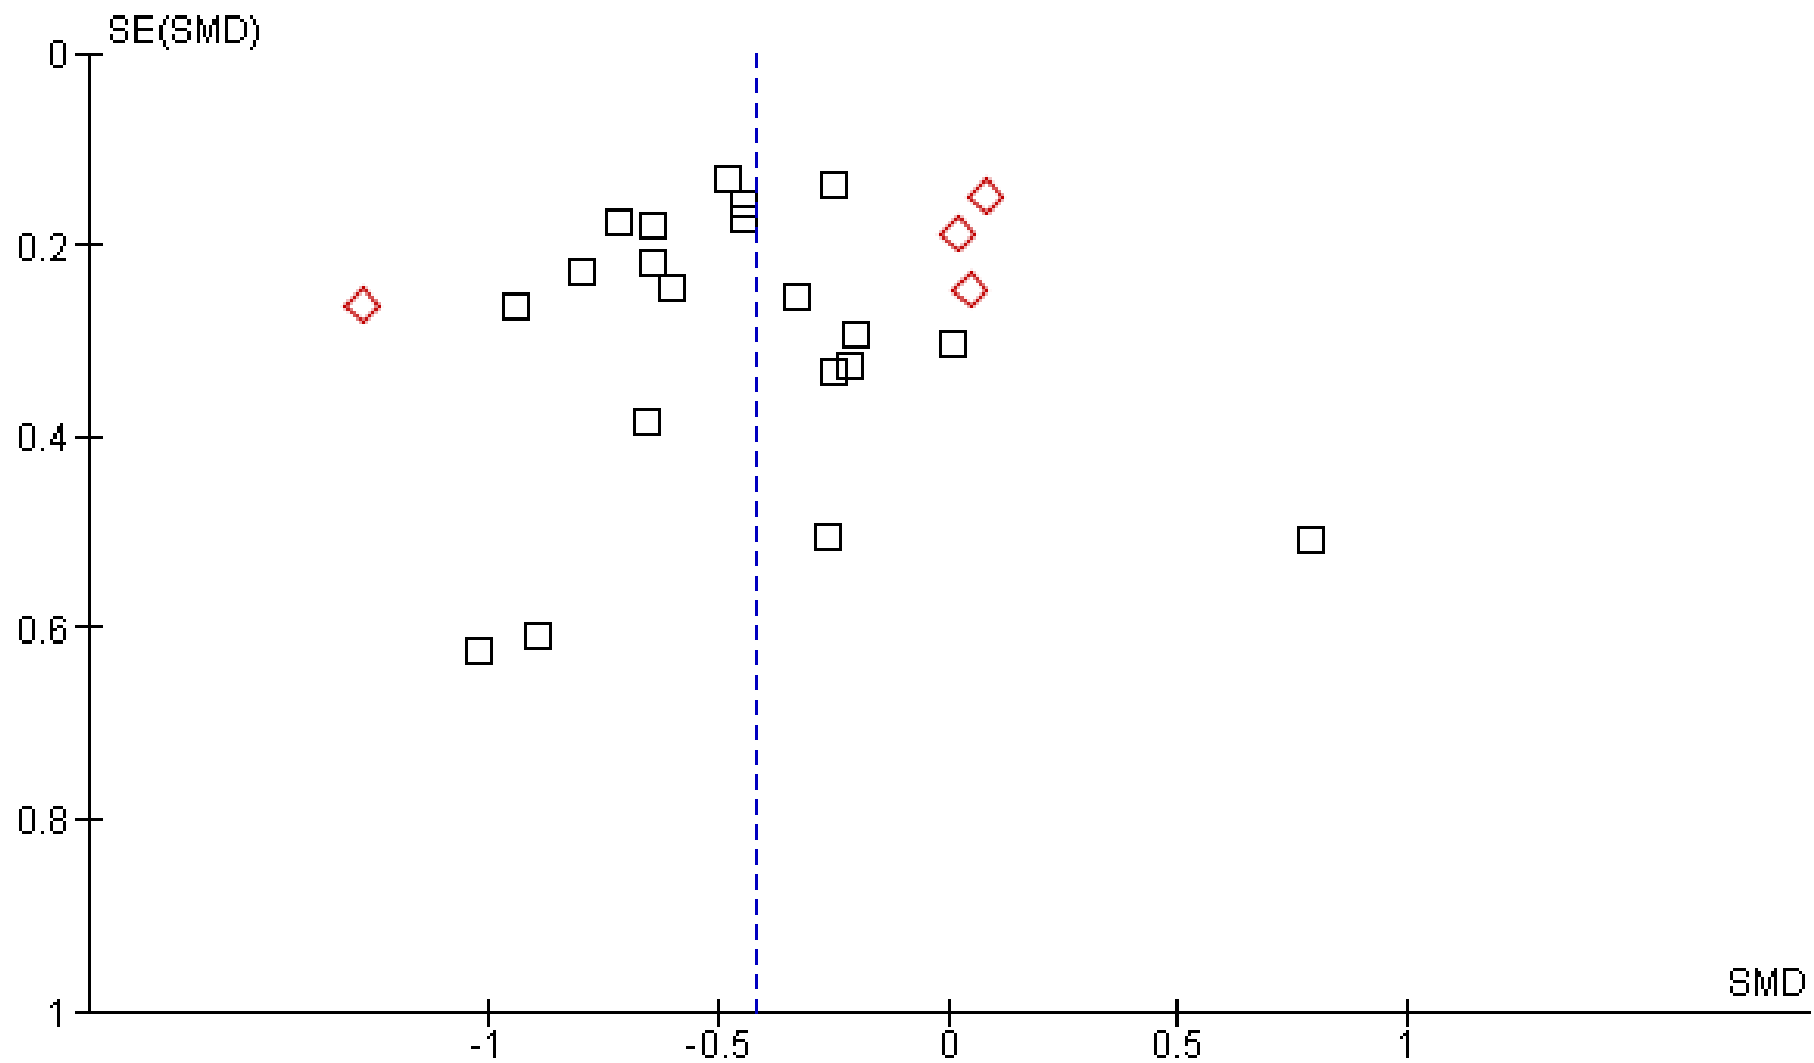

**Subgroups**

- HP+ versus HP- actual
- ◇ HP+ versus HP- removed

Supplement: MOESM3 [file 9437354]
